# Supplementary material for: Metal-chelating nanoparticles as selective fluorescent sensor for Cu2+
Source: Royal Society of Chemistry journal article supplement (doi:10.1039/b407766k), 2004-01-01

---

## Metal-chelating nanoparticles as selective fluorescent sensor for Cu<sup>2+</sup>

Rachel Méallet-Renault, Robert Pansu, Sonia Amigoni-Gerbier and Chantal Larpent\*

### Supplementary Information

Synthesis and spectroscopy of Mesityl-BODIPY dye **1**

Synthesis of cyclam-functionalized nanoparticles **CNL** (Spectrophotometric titration of **CNL** with Cu(NO<sub>3</sub>)<sub>2</sub> and Absorption spectra of **CNL**+ Cu(NO<sub>3</sub>)<sub>2</sub>).

Loading of **CNL** with dye **1** : preparation of fluorescent complexing nanolatex **FCNL**

Spectroscopic analysis of fluorescent nanolatex **FCNL**

<sup>1</sup>H and <sup>13</sup>C NMR spectra of dye **1**

### Corresponding Author

Prof. C. Larpent  
SIRCOB, UMR CNRS 8086,  
Université de Versailles St Quentin en Y.,  
45 Avenue des Etats-Unis, 78035 Versailles Cedex, France.  
Fax: 33 139254452; E-mail: larpent@chimie.uvsq.fr ; Fax: 33 139254452;

---

### Synthesis and spectroscopy of Mesityl-BODIPY dye **1**

**1** was synthesized using the conventional method from 2,4-dimethyl-3-ethylpyrrole and 2,4,6-trimethylbenzaldehyde.<sup>1</sup>

In dichloromethane, the absorption maximum wavelength is 526 nm with a molar extinction coefficient of 58000 mol.L<sup>-1</sup>.cm<sup>-1</sup>. Emission maximum wavelength is 535 nm. Absorption and excitation spectra are identical.

### Synthesis of cyclam-functionalized nanoparticles **CNL**

The aqueous suspension of metal-binding nanoparticles (cyclam-functionalized nanolatex **CNL**) was prepared according to the previously described procedure.<sup>2</sup> A microemulsion consisting of a mixture of styrene (600 µL), divinylbenzene (740 µL), N-vinylbenzylcyclam (400mg), DMPA (radical photoinitiator, 140 mg, 0.05mol/mol of monomers) in 40 mL of a 15 %wt solution of dodecyltrimethylammonium bromide (DTAB) in water was polymerized under white light irradiation at 20°C for 15h. The stable translucent nanolatex **CNL** was used without further purification for dye loading and spectroscopic studies.

Final polymer content 4%wt. The diameter of the particles was deduced from QELS and TEM analyses.

Metal-binding capacity was deduced from metal uptakes. **CNL** binds Cu<sup>II</sup> (complexation yield > 95%) as well as Zn<sup>II</sup>, Ni<sup>II</sup>, Co<sup>II</sup> (complexation yields 70-80%).

The Cu-binding capacity of the **CNL** nanolatex is 0.54 mmol Cu<sup>II</sup> /g polymer (2.16 10<sup>-2</sup> mol/L of suspension, almost complete complexation of the cyclam residues).

Spectrophotometric titration of the Cu-Cyclam complex (absorption wavelength 536nm, figure S2) upon addition of a dilute 0.01M solution of Cu(NO<sub>3</sub>)<sub>2</sub>, shown in figure S1, indicates that about 0.45 mmol Cu per g polymer are instantaneously complexed in dilute solution (18 mmol/L of suspension). That means that about 85% of the cyclam residues are involved in a rapid solution-like complexation process (instantaneous complexation of Cu<sup>II</sup> in dilute medium).

Figure S1 : Spectrophotometric titration of CNL with  $\text{Cu}(\text{NO}_3)_2$  0.01M.

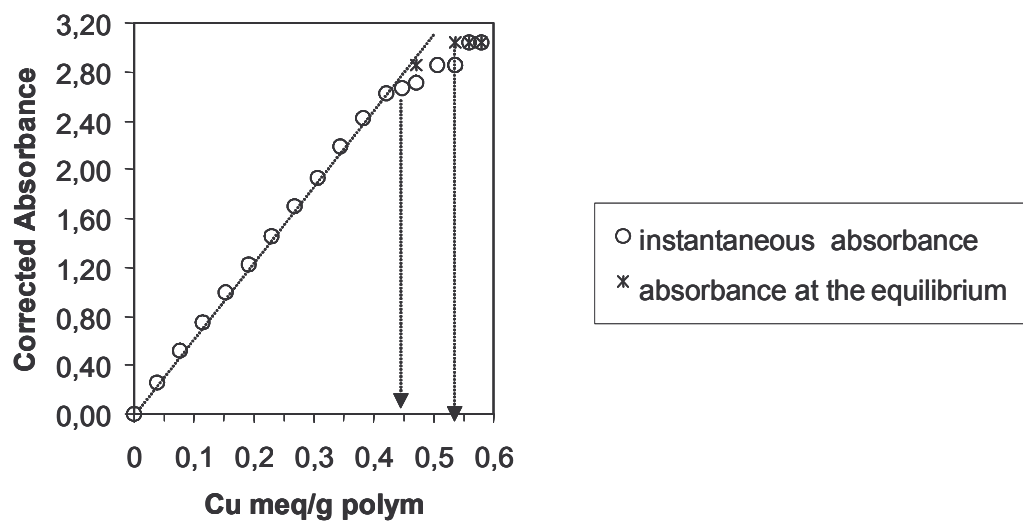

Figure S2 : Absorption spectra of CNL +  $\text{Cu}(\text{NO}_3)_2$  0.01M.

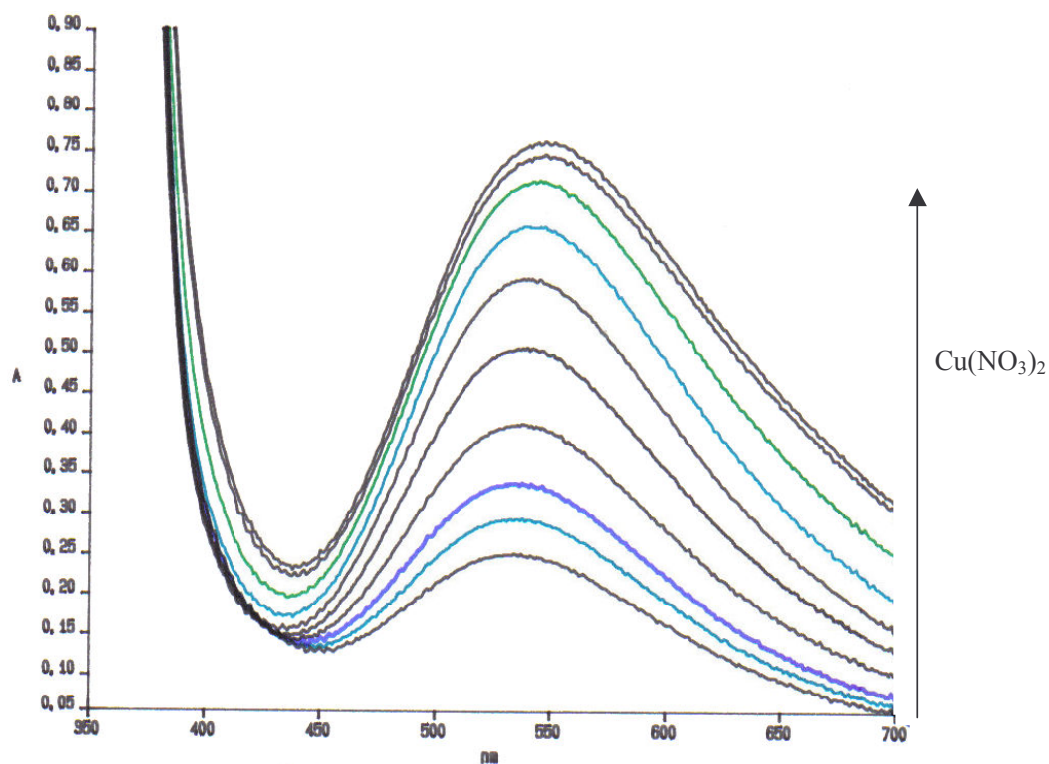

### **Loading of CNL with dye 1 : preparation of fluorescent complexing nanolatex FCNL**

1 has been encapsulated by swelling: Swelling experiments were performed by adding a small aliquot (12µL) of a solution of 1 in dichloromethane to 300µL of the as-prepared nanolatex **CNL** followed by evaporation of the solvent (24h at room temperature). Various loading concentrations have been used. The amount of encapsulated dye was quantified from the absorbance of 1 at 528.5 nm. The maximum load is about 85µmol/g polymer (i.e. 100 molecules of 1 per particle).

The present study was performed on a fluorescent nanolatex **FCNL** containing 59µmol/g polymer, well below the maximum loading. No leakage of 1 has been observed over 1 month.

### **Spectroscopy**

A U.V.-vis. Varian CARY 500 spectrophotometer was used. Excitation and emission spectra were measured on a SPEX Fluorolog-3 (Jobin-Yvon). A right-angle configuration was used. Optical density of the samples was checked to be less than 0.1 to avoid reabsorption artefacts.

Time-resolved spectroscopy : The fluorescence decay curves were obtained with a time-correlated single-photon-counting method using a titanium-sapphire laser (82 MHz, repetition rate lowered to 4 MHz thanks to a pulse-peaker, 1 ps pulse width, a doubling crystals is used to reach 495 nm excitation) pumped by an argon ion laser. The Levenberg-Marquardt algorithm was used for non-linear least squares fits.

### **Spectroscopic analysis of fluorescent nanolatex FCNL :**

Fluorescent metal-complexing nanolatex **FCNL** (59µmol 1/g polymer) was diluted 1000 times in pure water before spectroscopic analyses.

Characteristics of the **FCNL** sample studied:

- Polymer content : 40mg/L
- Remaining surfactant DTAB : 0.014%wt ( $0.45 \cdot 10^{-3}$  M). The concentration of remaining surfactant is well below its critical micelle concentration ( $54 \cdot 10^{-3}$  M, 16.6g/L, 1.66%wt) so that micellar solubilization of the dye can be neglected.
- Dye content : 59µmol 1/g polymer,  $2.36 \cdot 10^{-6}$  mol/L of **FCNL**. About 75 molecules of dye per particle.
- Cyclam content : 0.54mmol/g polymer,  $2.16 \cdot 10^{-5}$  mol/L of **FCNL**, about 700 molecules per particle. About  $1.8 \cdot 10^{-5}$  mol of cyclam per liter of **FCNL** are involved in a rapid complexation process (about 600 molecules per particle).

The calculated Förster radius is about 2.1-2.3 nm. The non linear variation of  $I_0/I$  with Cu concentration can be interpreted by the presence of two populations of fluorophores.<sup>3</sup> A modified Stern-Volmer plot (see figure S3 below) shows that 80% of dye molecules can be quenched (accessible dyes) and that only 20% of the fluorophores are not accessible for energy transfer : the distance between these dyes and the complexes is larger than the Förster radius.<sup>§</sup>

Assuming that **1** is distributed all over the particle volume, this is in acceptable agreement with the volume fractions of the core 20-25% (internal radius about 5 nm, not accessible for energy transfer) and the shell 75-80% (thickness 3nm).

<sup>§</sup> According to the Perin's model that states that beyond a critical radius no quenching occurs and within that radius quenching occurs with 100% efficiency.

**Figure S3 : Modified Stern-Volmer Plot :  $I_0/(I_0-I)$  vs  $1/[Cu]$**

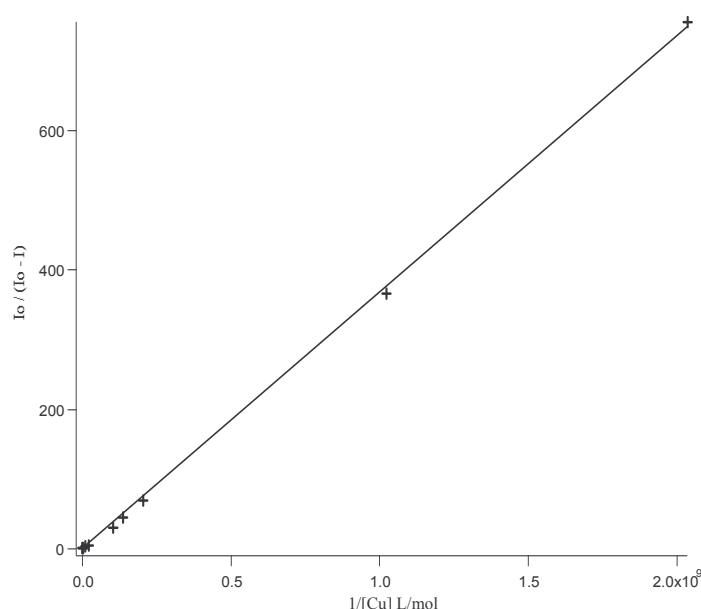

(+) : experimental points, line: calculated

$$\frac{I_0}{I_0 - I} = \frac{1}{f} + \frac{1}{f * K * [Cu - Complex]}$$

f = fraction of accessible dye ; K = Stern-Volmer Constant

Fitting parameters : f = 0.8 ; K =  $3.3 \cdot 10^6$  (+/-  $0.4 \cdot 10^6$ )

## References

1. M. Kollmannsberg, T. Gareis, S. Heintl, J. Breu and J. Daub, *Angew. Chem. Int. Ed. Engl.*, 1997, **36**, 1333-1335.
2. S. Amigoni-Gerbier, S. Desert, T. Gulik-Kryswicki and C. Larpent, *Macromolecules*, 2002, **35**, 1644-1650.
3. K. Nakashima, S. Tanida, et al., *J. Photochem. Photobiol. A : Chemistry*, 1998, **117**, 111-117.

<sup>1</sup>H NMR spectrum of dye 1 (300MHz, CDCl<sub>3</sub>)

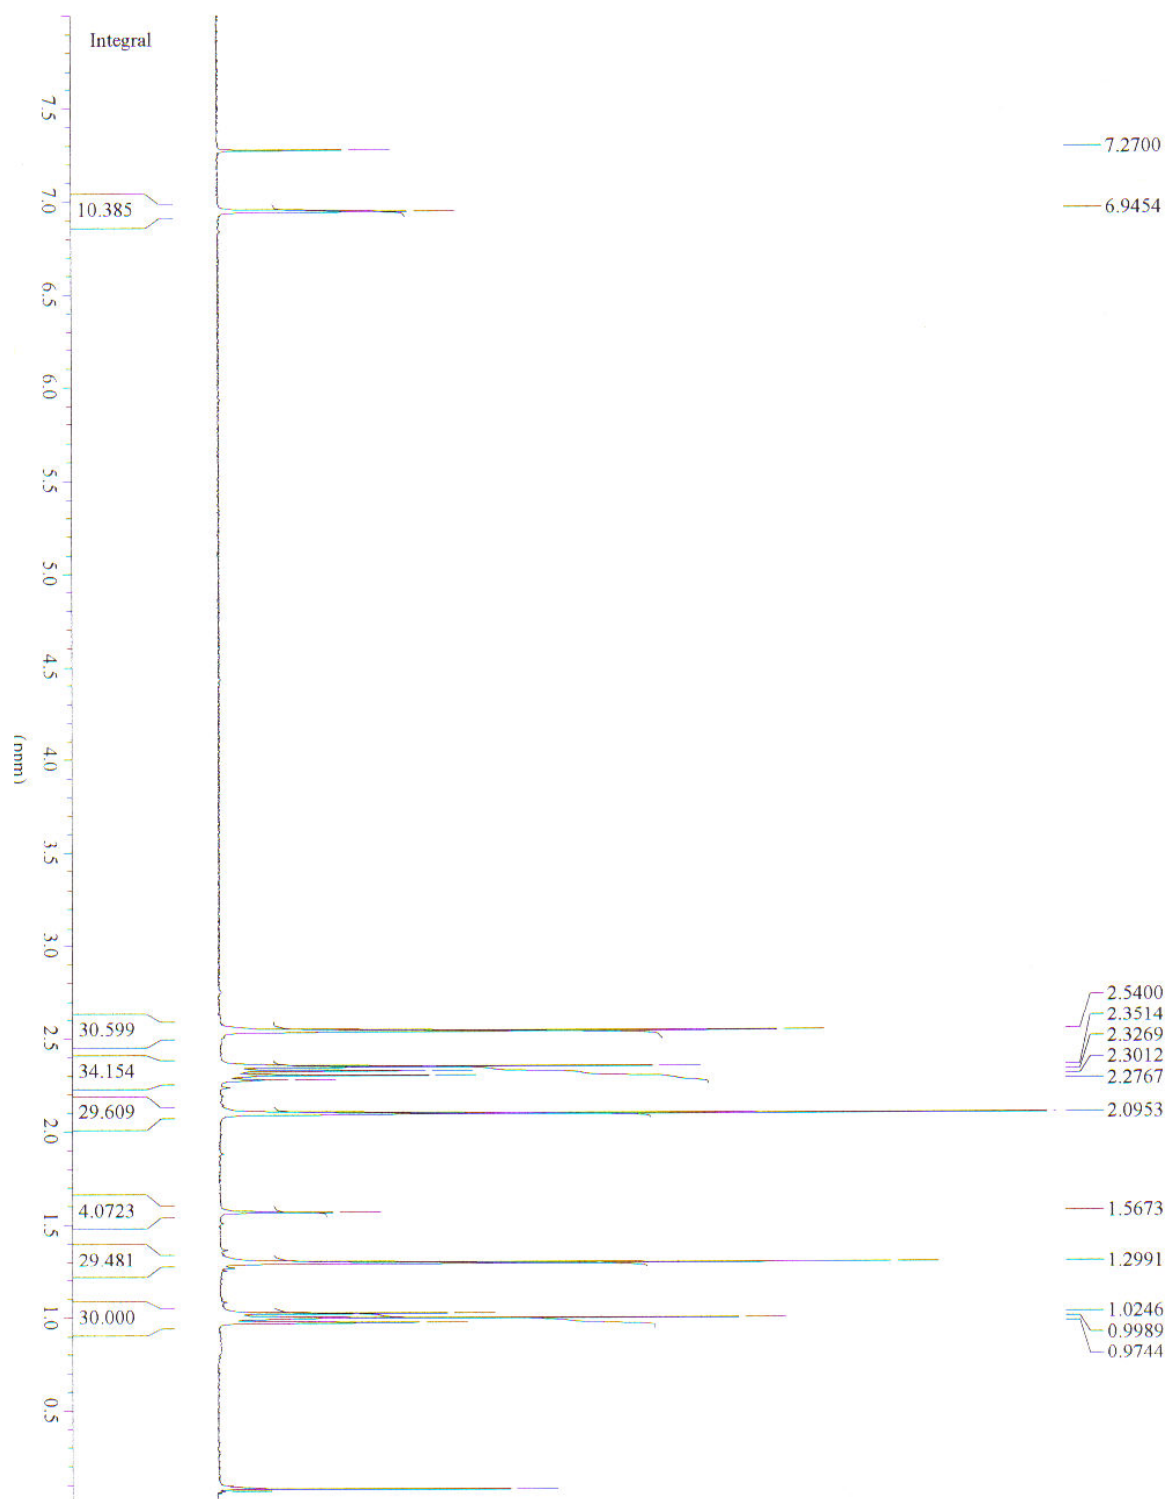

$^{13}\text{C}$  NMR spectrum of dye 1 (75 MHz,  $\text{CDCl}_3$ )

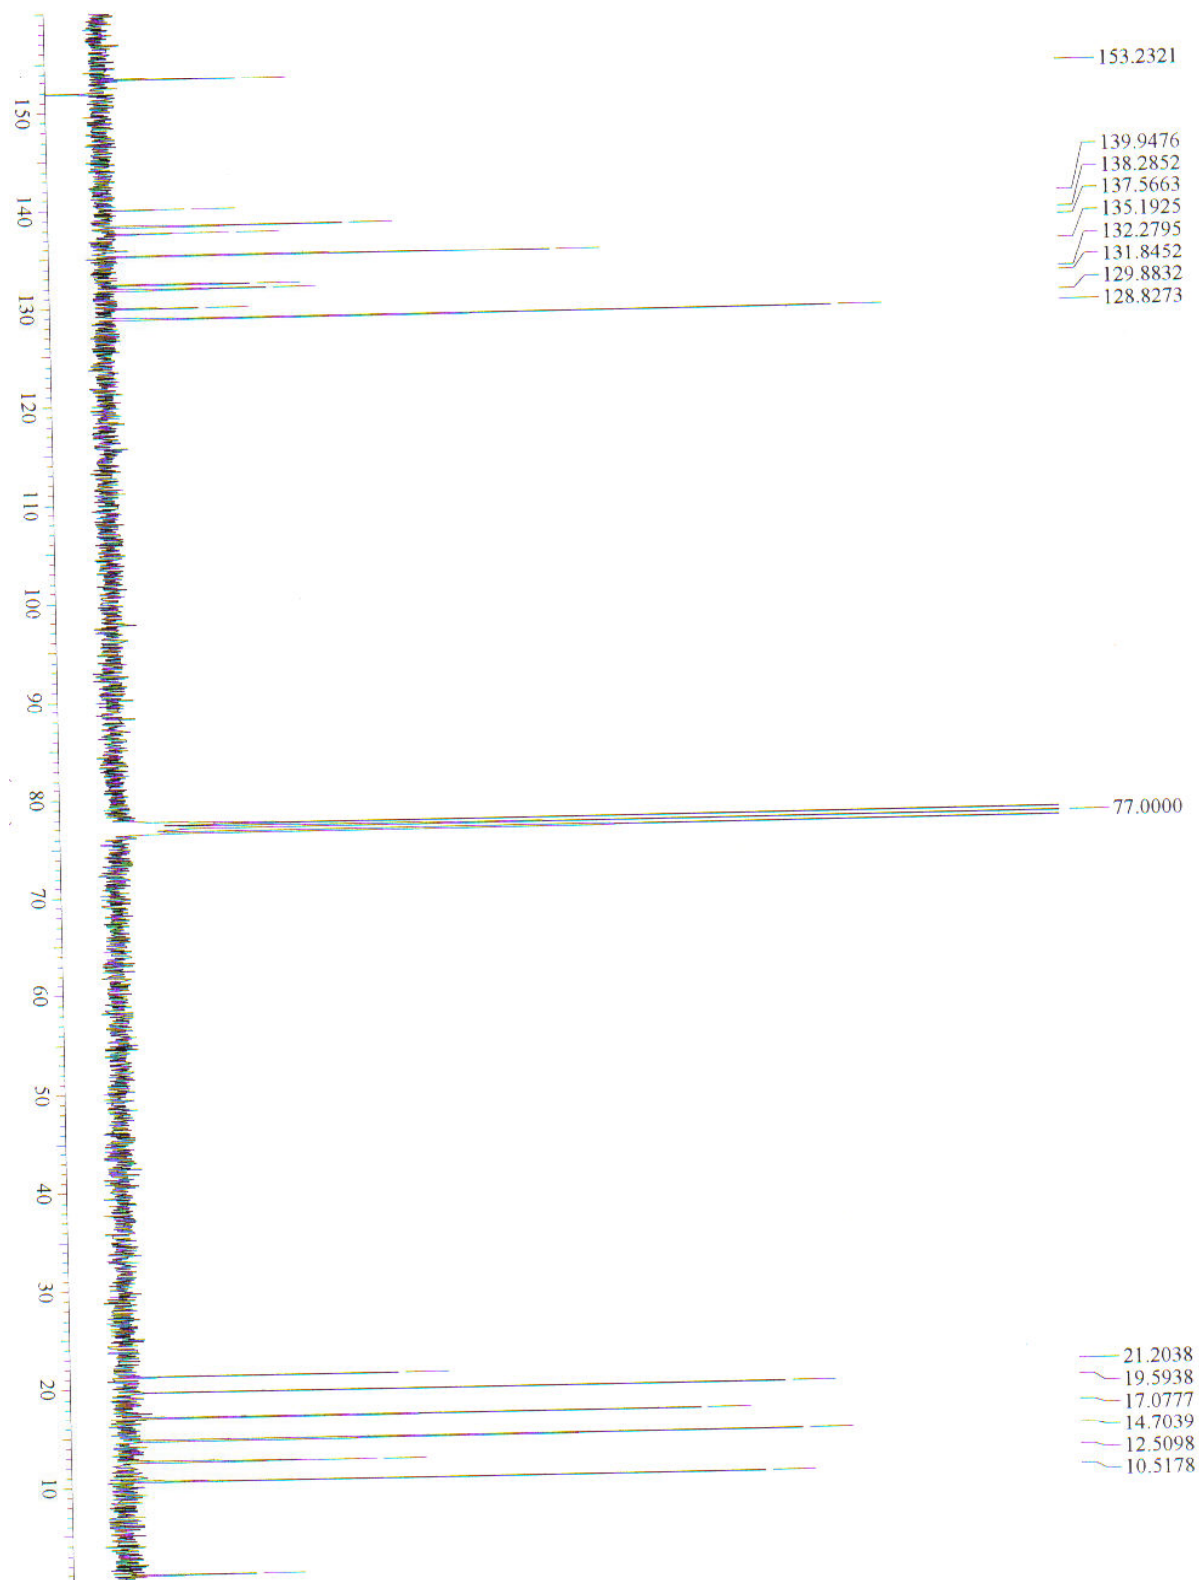

Supplement: b407766k.pdf [file b407766k.pdf]
